# Supplementary material
Source: PubMed Central journal article supplement (PMC4769187)
Supplement: ASN.2014101035_ASN2014101035SupplementaryData.pdf [file ASN.2014101035_ASN2014101035SupplementaryData.pdf]

## SUPPLEMENTARY MATERIALS

### Supplementary S1:

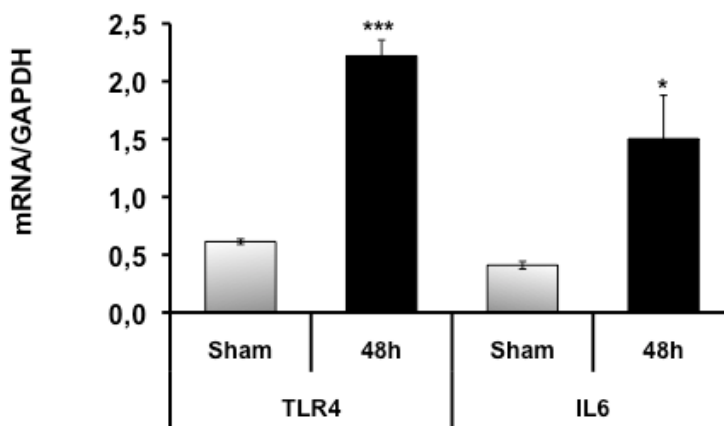

Figure S1: TLR4 and IL6 mRNA expressions in the kidney

The kidneys of Sham and 48-hour-infected WT mice were harvested, and the mRNA levels of both TLR4 and IL-6 were quantified by RT-qPCR. Data were normalized by GAPDH-mRNA levels. The results are the mean  $\pm$  s.e.m. of at least six individual mice in each group. \* $P < 0.05$ , \*\*\* $P < 0.0001$ .

### Supplementary S2:

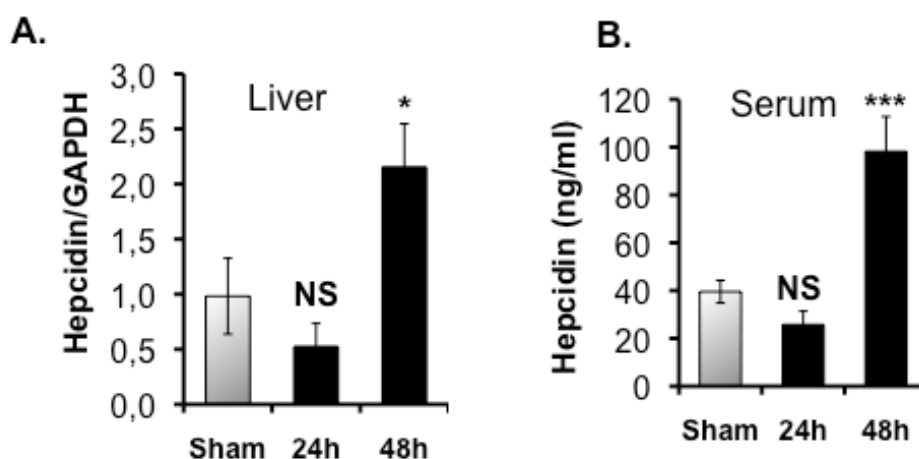

Figure S2:

CBA/J WT mice were infected with  $10^9$  CFUs of CFT073, and bacterial counts were performed on bladder and kidneys at 24 and 48 h postinfection. (A) Hepcidin mRNA quantification in WT liver at 24 and 48 hours postinfection. (B) WT serum hepcidin measured by LC-MS/MS at 24 and 48 hours post-infection. (Sham) means uninfected mice. The results are the mean  $\pm$  s.e.m. of at least six individual mice in each group. \* $P < 0.05$ , \*\*\* $P < 0.0001$ . NS indicates non-significant.

Supplementary S3:

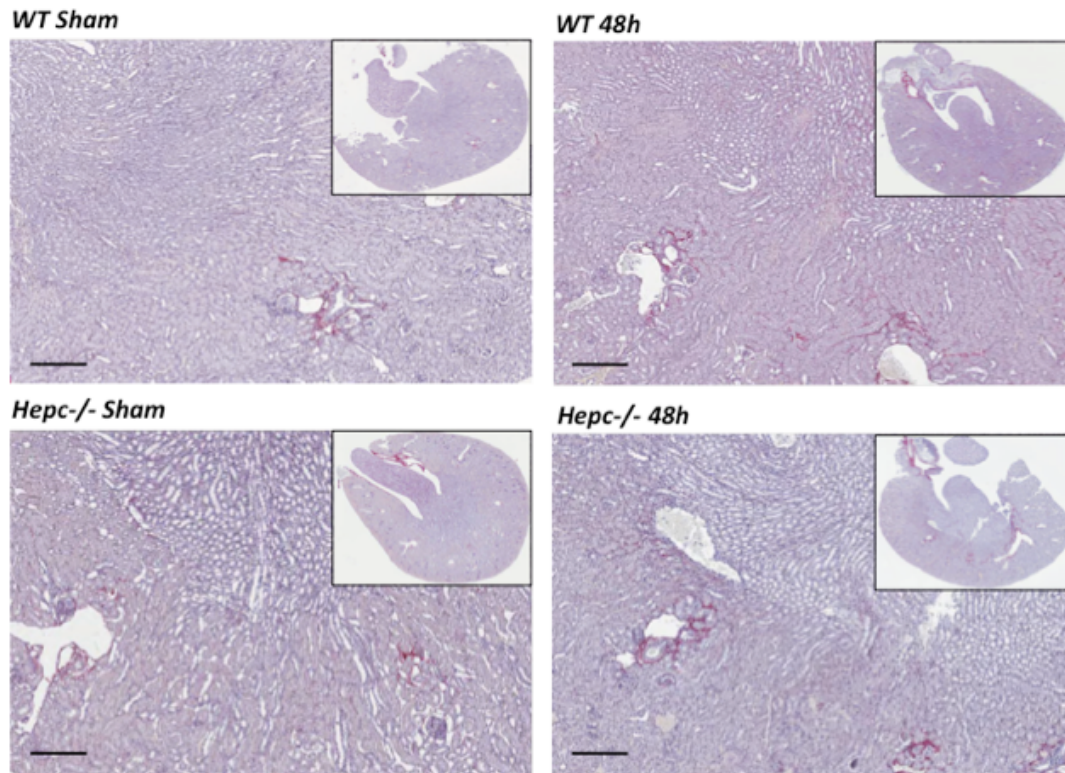

Figure S3:

Histologic examination

The kidneys were fixed in 4% formaldehyde, embedded in paraffin and sections of 4- $\mu$ m were then stained with picro-sirius red (PSR). Images were acquired using a ScanScope digital scanner (Aperio, TRIBVN, France). Morphologic assessments were conducted by two independent renal pathologists who were uninformed about the treatments and mice phenotypes.

Supplementary S4:

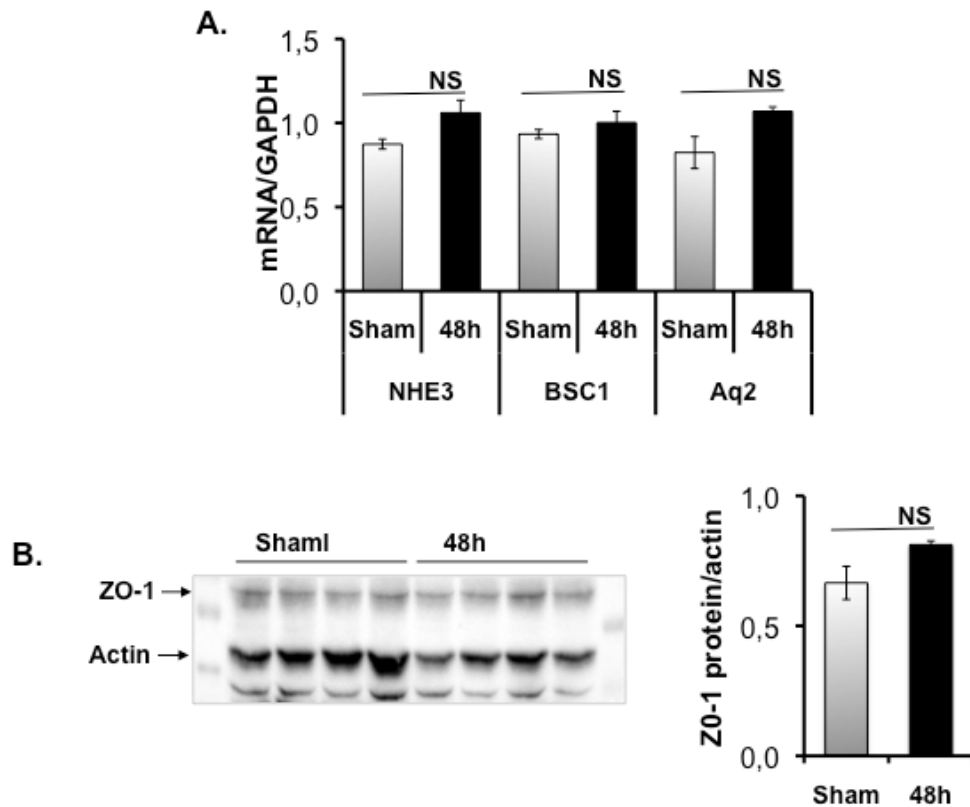

Figure S4: Renal cell damage evaluation

The kidneys of Sham and 48-hour-infected WT mice were harvested for the following studies. (A) The mRNA levels of Na<sup>+</sup>/H<sup>+</sup> exchanger 3 (NHE3), bumetanide-sensitive Na<sup>+</sup>/K<sup>+</sup>/2Cl<sup>-</sup> cotransporter 1 (BSC1) and the water channel aquaporin-2 (AQ2) were quantified by RT-qPCR. Data were normalized by GAPDH-mRNA levels. (B) Protein levels of tight junction ZO-1 were quantified by Western blot. The left panel shows a representative western blot, and the right panel shows the quantification. Data were normalized by  $\beta$ -actin protein level. The results are the mean  $\pm$  s.e.m. of at least six individual mice in each group. NS indicates non-significant

Supplementary S5:

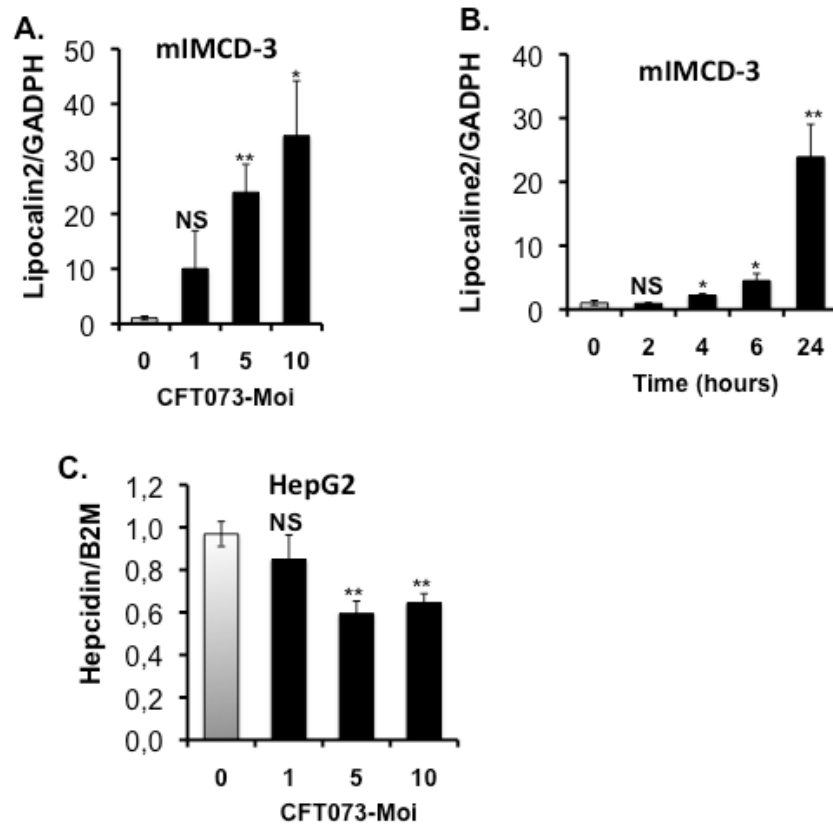

Figure S5: Effect of CFT073 on lipocalin-2 and hepcidin expressions in cultured renal mIMCD-3 and hepatic HepG2 cells respectively.

mIMCD-3 and HepG2 cell lines were infected with PFA-fixed CFT073, and the mRNA level of lipocalin-2 was explored at different MOIs (MOI, multiplicity of infection, number of bacteria per number of monolayer cells) and different incubation times. (A) shows the effect of different MOIs on lipocalin-2 mRNA abundance in mIMCD-3 cells. (B) shows the time-course effect using an MOI of 5:1. (C) Hepcidin-mRNA repression in HepG2 cells in response to different MOIs of CFT073. All mRNA quantifications were determined by RT-qPCR. Data were normalized by GAPDH-mRNA levels. The results are the mean  $\pm$  s.e.m. of at least three independent cultures. \* $P < 0.05$ , \*\* $P < 0.03$ . NS indicates non-significant.

Table S1

|               | WT         | Hepc-/-      | Genotype (Sham) |
|---------------|------------|--------------|-----------------|
| (ng/ml)       | Sham       | Sham         | <i>P</i> value  |
| IL-6          | 15.9 ± 0.7 | 7.5 ± 4.4    | <b>NS</b>       |
| IFN- $\gamma$ | 51 ± 3.1   | 65.5 ± 5.6   | <b>NS</b>       |
| TNF- $\alpha$ | 2.3 ± 0.3  | 5.3 ± 1.1    | <b>0.05</b>     |
| IL-1 $\alpha$ | 272 ± 12.3 | 417 ± 19.3   | <b>0.002</b>    |
| CXCL2         | 12.6 ± 1.6 | 27.4 ± 4.2   | <b>NS</b>       |
| CCL5          | 58.1 ± 9.6 | 141.3 ± 18.8 | <b>NS</b>       |

Table S1

Expression profile of inflammatory cytokines in WT and Hepc-/- kidneys prior CFT073 infection (Sham). The results are the mean ± s.e.m. NS indicates non-significant.
